# Supplementary material for: Evolution of optimal growth temperature in Asgard archaea inferred from the temperature dependence of GDP binding to EF-1A
Source: Springer Nature journal article supplement (doi:10.1038/s41467-024-44806-1), 2024-01-15
Supplement: 41467_2024_44806_MOESM3_ESM.pdf [file 41467_2024_44806_MOESM3_ESM.pdf]

## **Description of Additional Supplementary Files:**

**Supplementary Data 1:** Statistical analysis of the optimal GDP-binding temperature of Asgard EF-1A proteins.  $T_{opt}$ , calculated optimal GDPbinding temperature;  $q_{05}$ , 5th percentile of the peak temperature distribution;  $q_{95}$ , 95th percentile of the peak temperature distribution.

**Supplementary Data 2:** Prediction of optimal growth temperature of Asgard archaea based on the proteomic features. The sample collection environments for metagenomics are listed.

**Supplementary Data 3:** Amino acid sequences of ancestral Asgard EF-1A used in this study.
