# Supplementary material for: Evolution of optimal growth temperature in Asgard archaea inferred from the temperature dependence of GDP binding to EF-1A
Source: Nat Commun. 2024 Jan 15;15:515. doi: 10.1038/s41467-024-44806-1 (PMC10789797; doi:10.1038/s41467-024-44806-1)
Supplement: Supplementary file 1 — Supplementary Information [file 41467_2024_44806_MOESM1_ESM.pdf]

**Fig. S1 Phylogenetic analysis of archaeal and eukaryotic EF-1A, and bacterial EF-Tu.**  
The maximum likelihood phylogenetic trees were inferred based on best-fitting empirical (LG+F+I+G4) and mixture (Q.pfam+C40+F+R6) models, respectively. Both the trees are rooted on the bacterial EF-Tu, and bootstrap values are shown for some nodes.

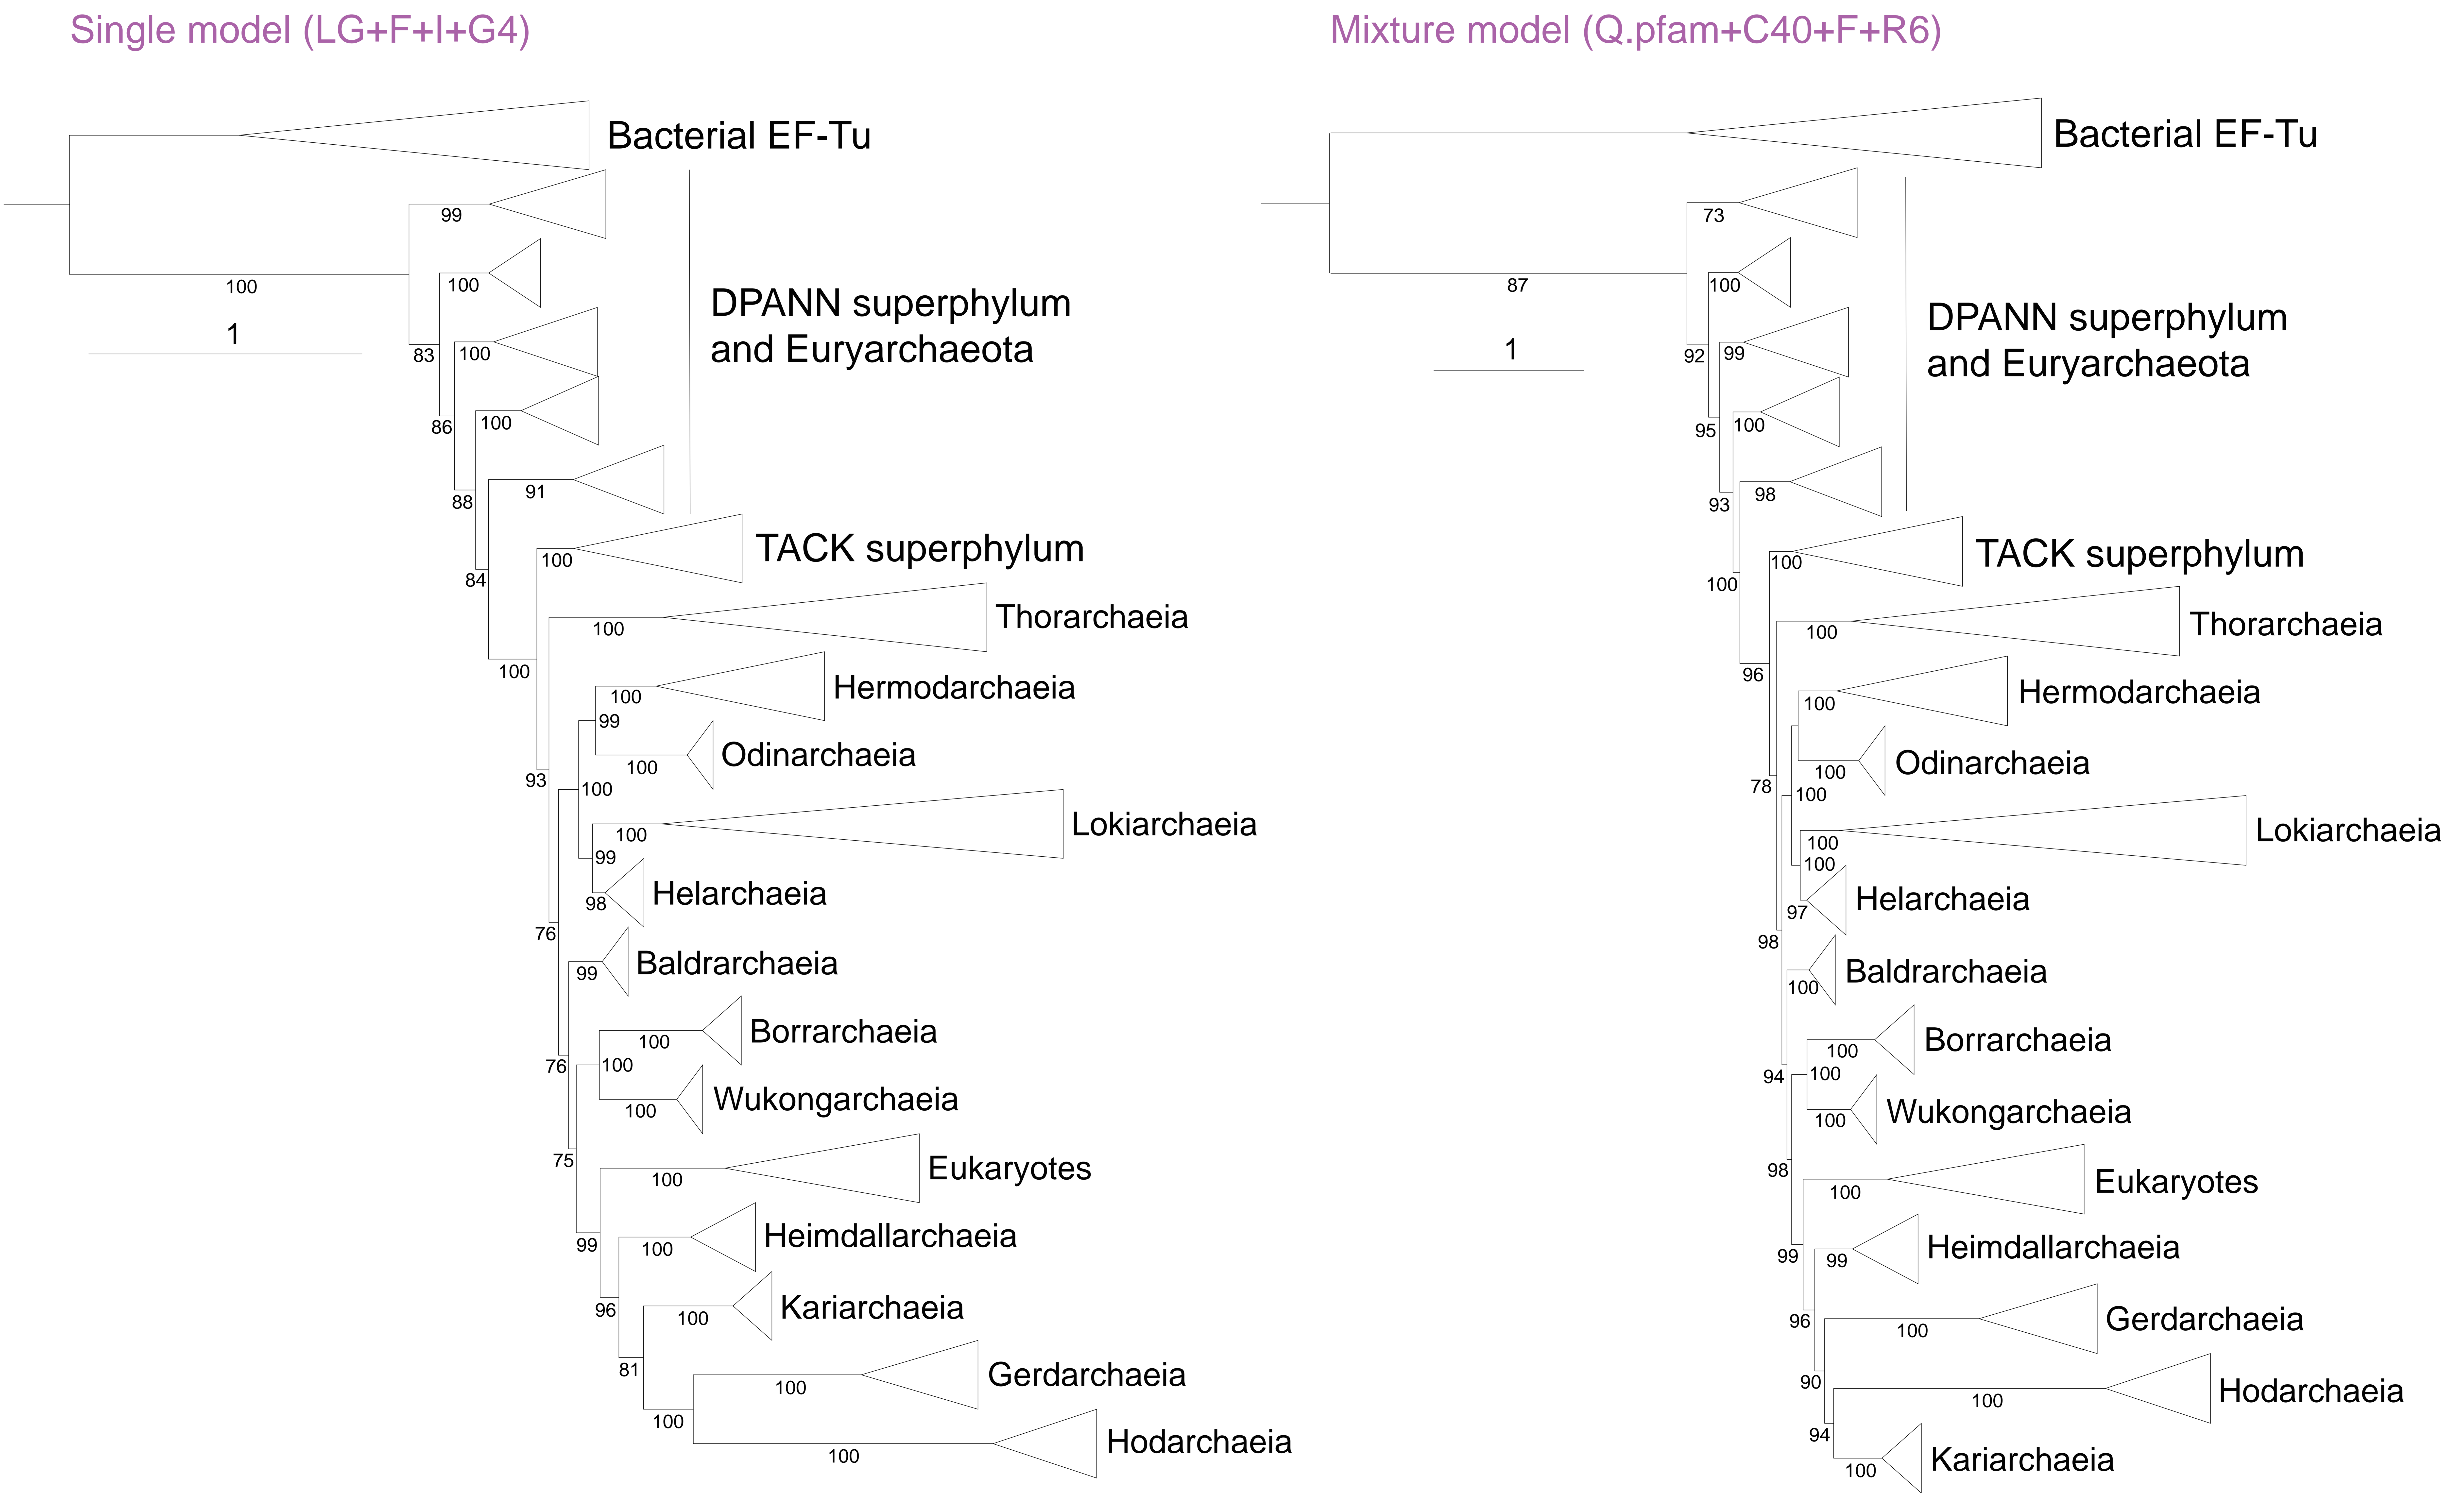

The tree was reconstructed by maximum likelihood analysis using 195 amino acid sequences based on best-fitting model LG+F+I+G4 model, with option "-bb 1000", using IQ-tree. The tree is rooted on bacterial EF-Tu, and the bootstrap values were shown on nodes.

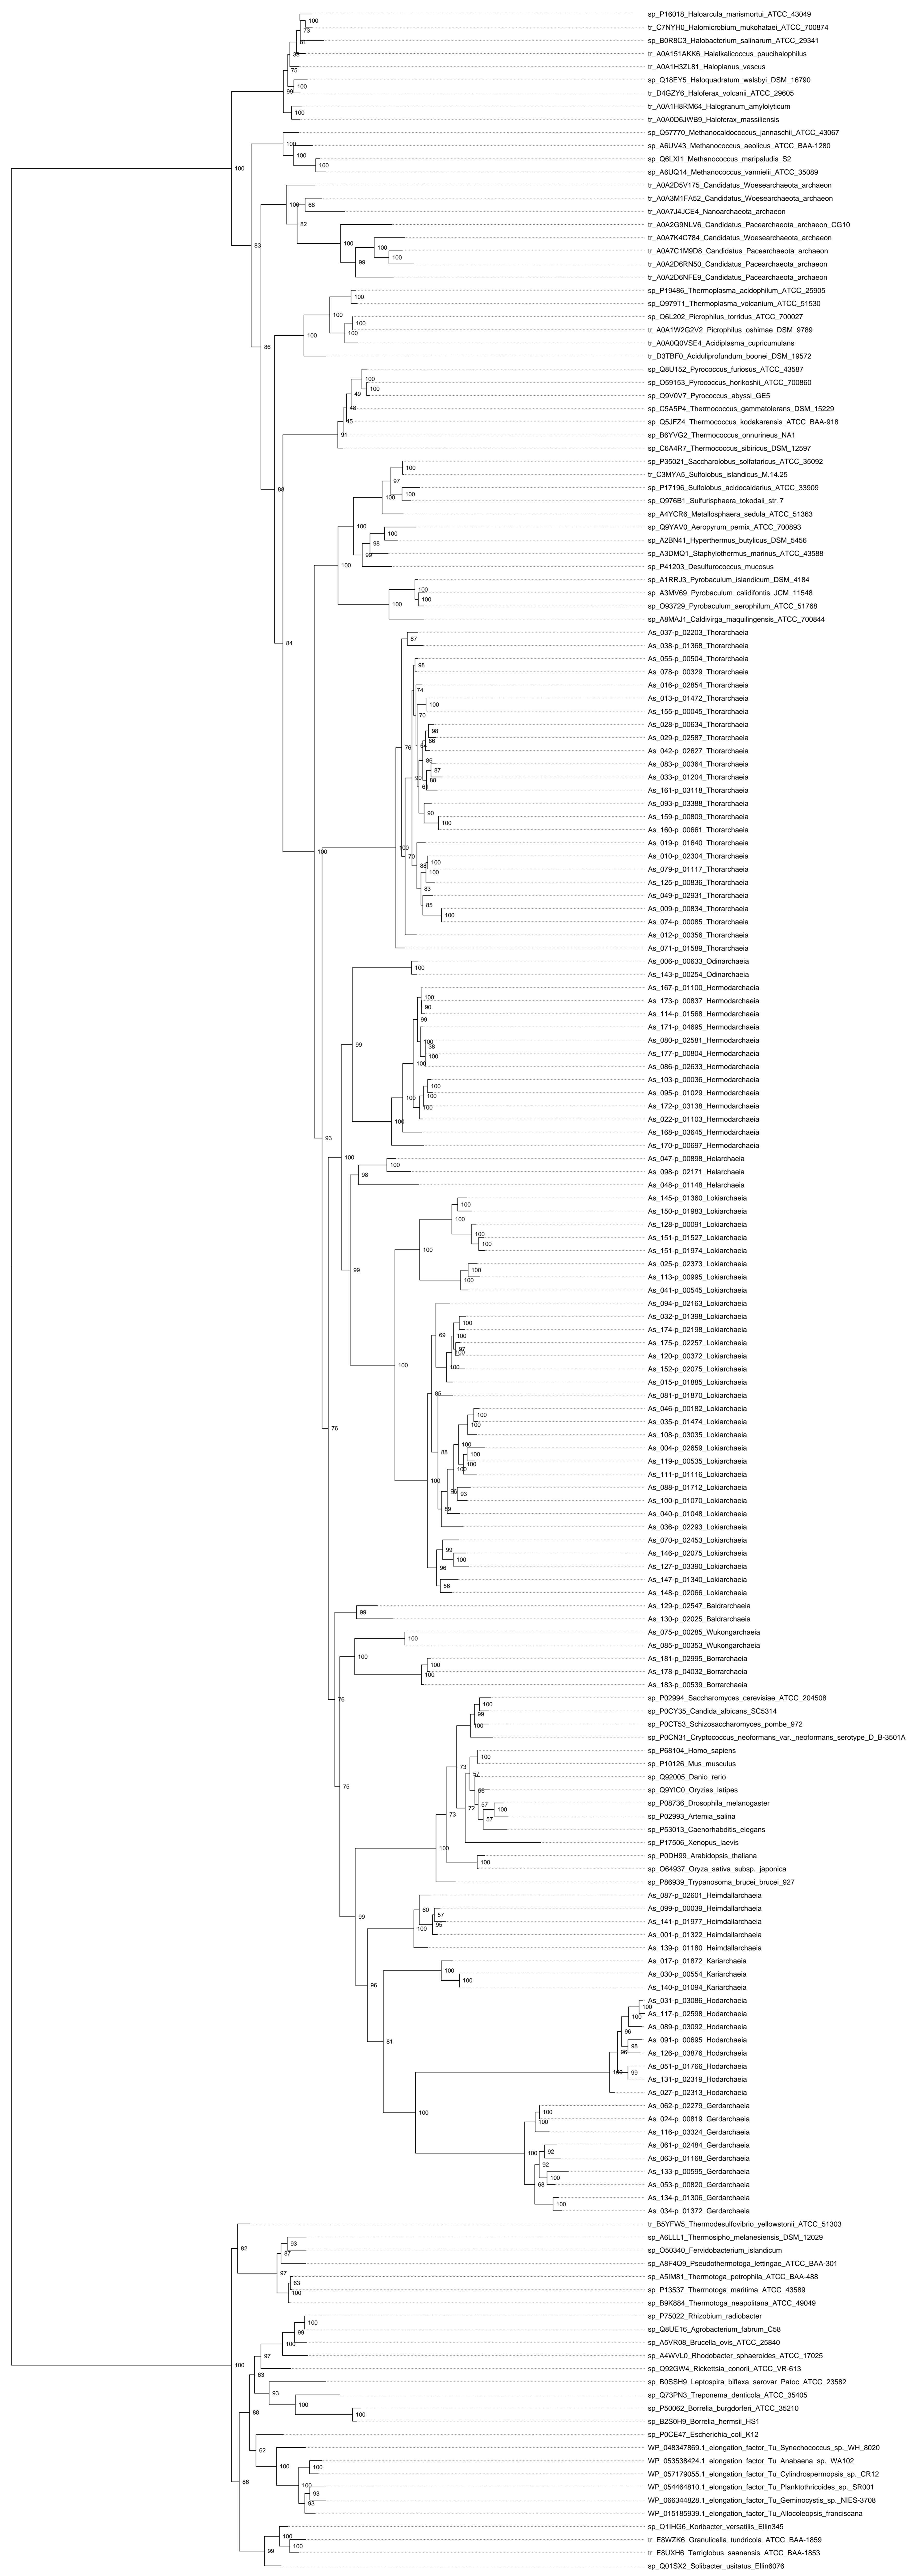

**Fig. S3 Thermal stability range of the EF-1A/Tu and ancestral EF-1A.**

The highest fluorescence intensity (a. u., arbitrary units) reflects that substantial protein unfolding occurred. Source data are provided as a Source Data file.

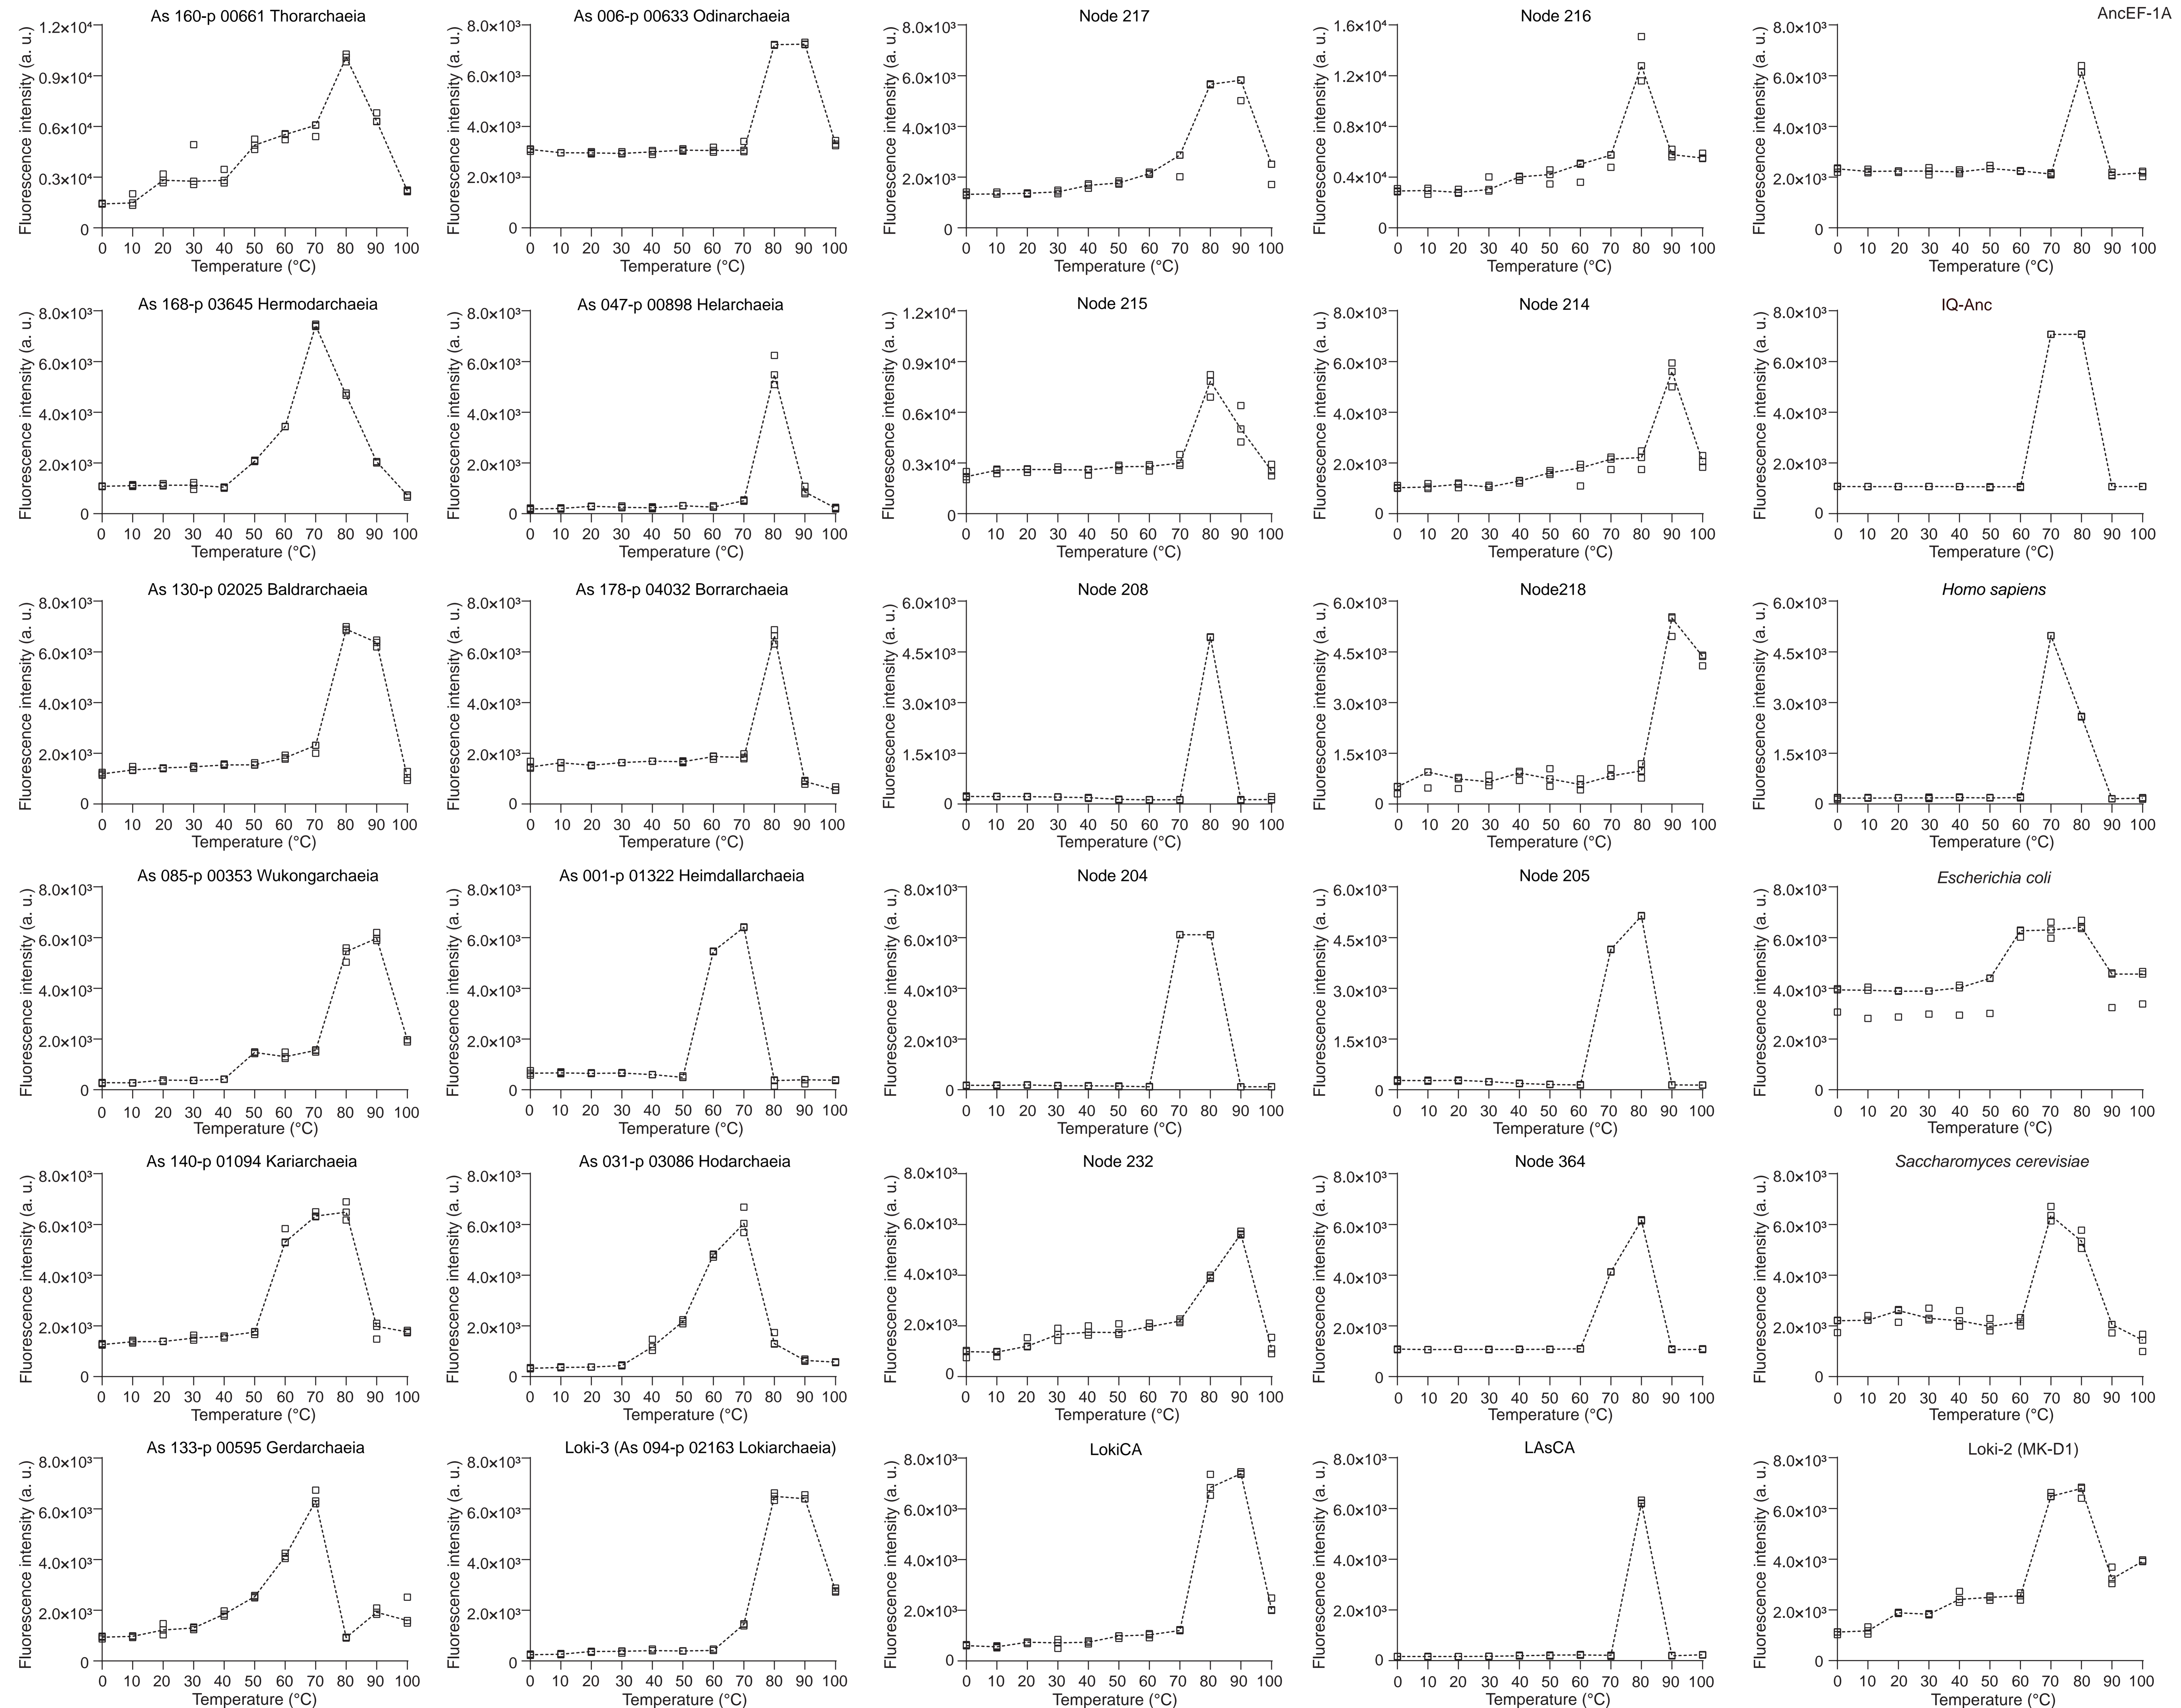

**Fig. S4 Statistical analysis of the optimal GDP-binding temperature of the EF-1A/Tu and ancestral EF-1A.**  
The testing EF-1A/Tu and ancestral EF-1A proteins were labeled with color according to their optimal temperature for GDP binding. Source data are provided as a Source Data file.

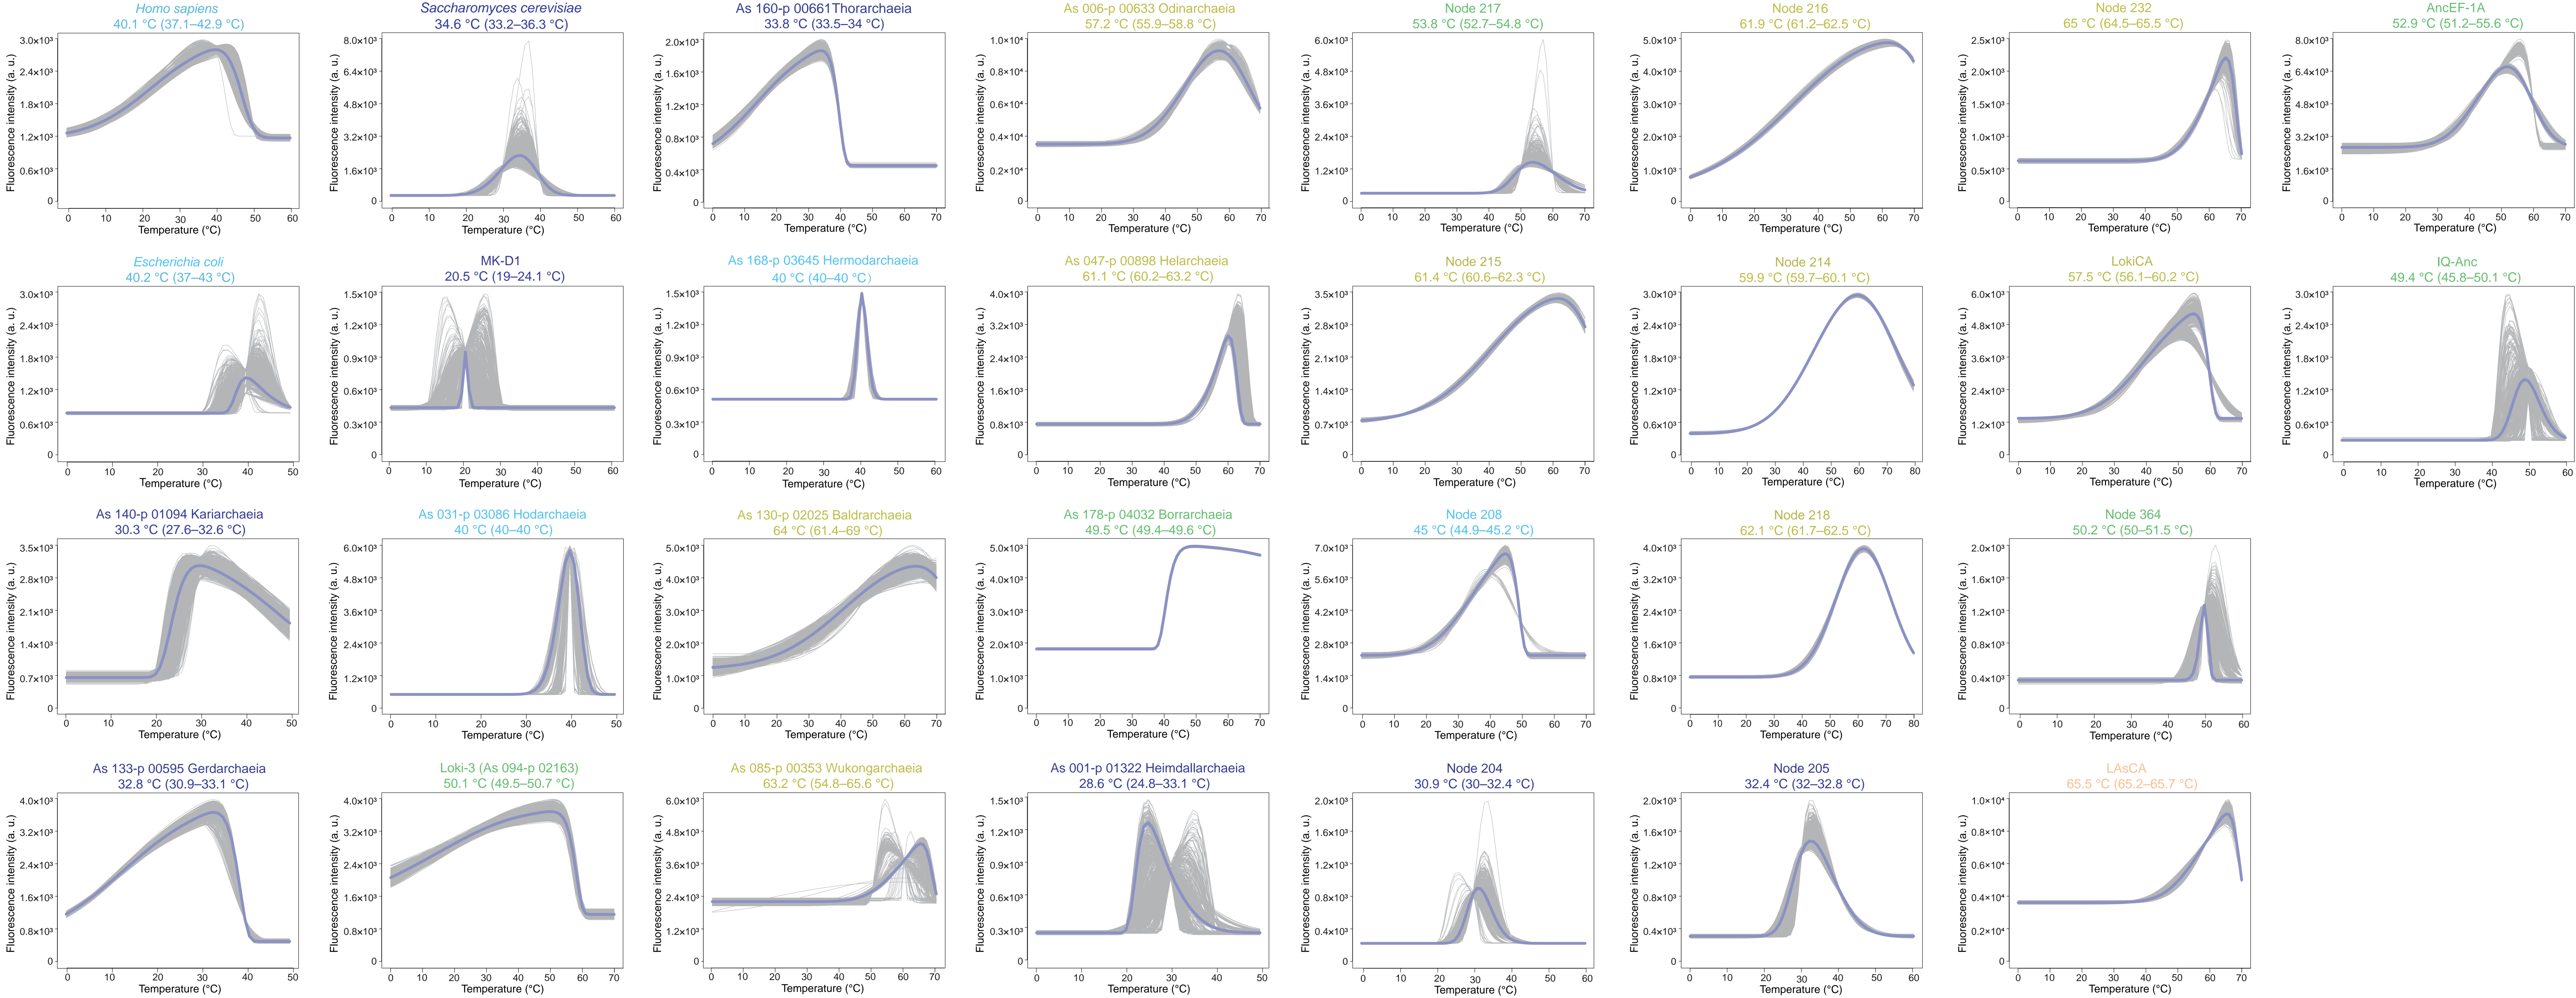



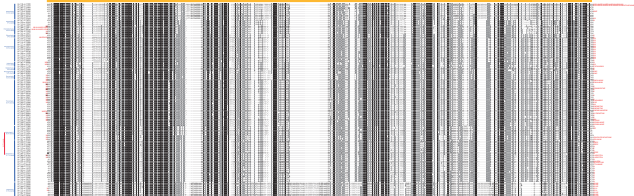

**Fig. S7 Correlation analysis between GDP-binding temperature and genomic-based inferred Asgard OGTs.**

(a) Correlation analysis between GDP-binding temperature and our inferred Asgard OGTs. (b) Correlation analysis between GDP-binding temperature and the Asgard OGTs predicted by reference 4. Both panels a and b were subject to t-test, and the p value was less than 0.0001, which met the conditions for correlation analysis. Source data are provided as a Source Data file

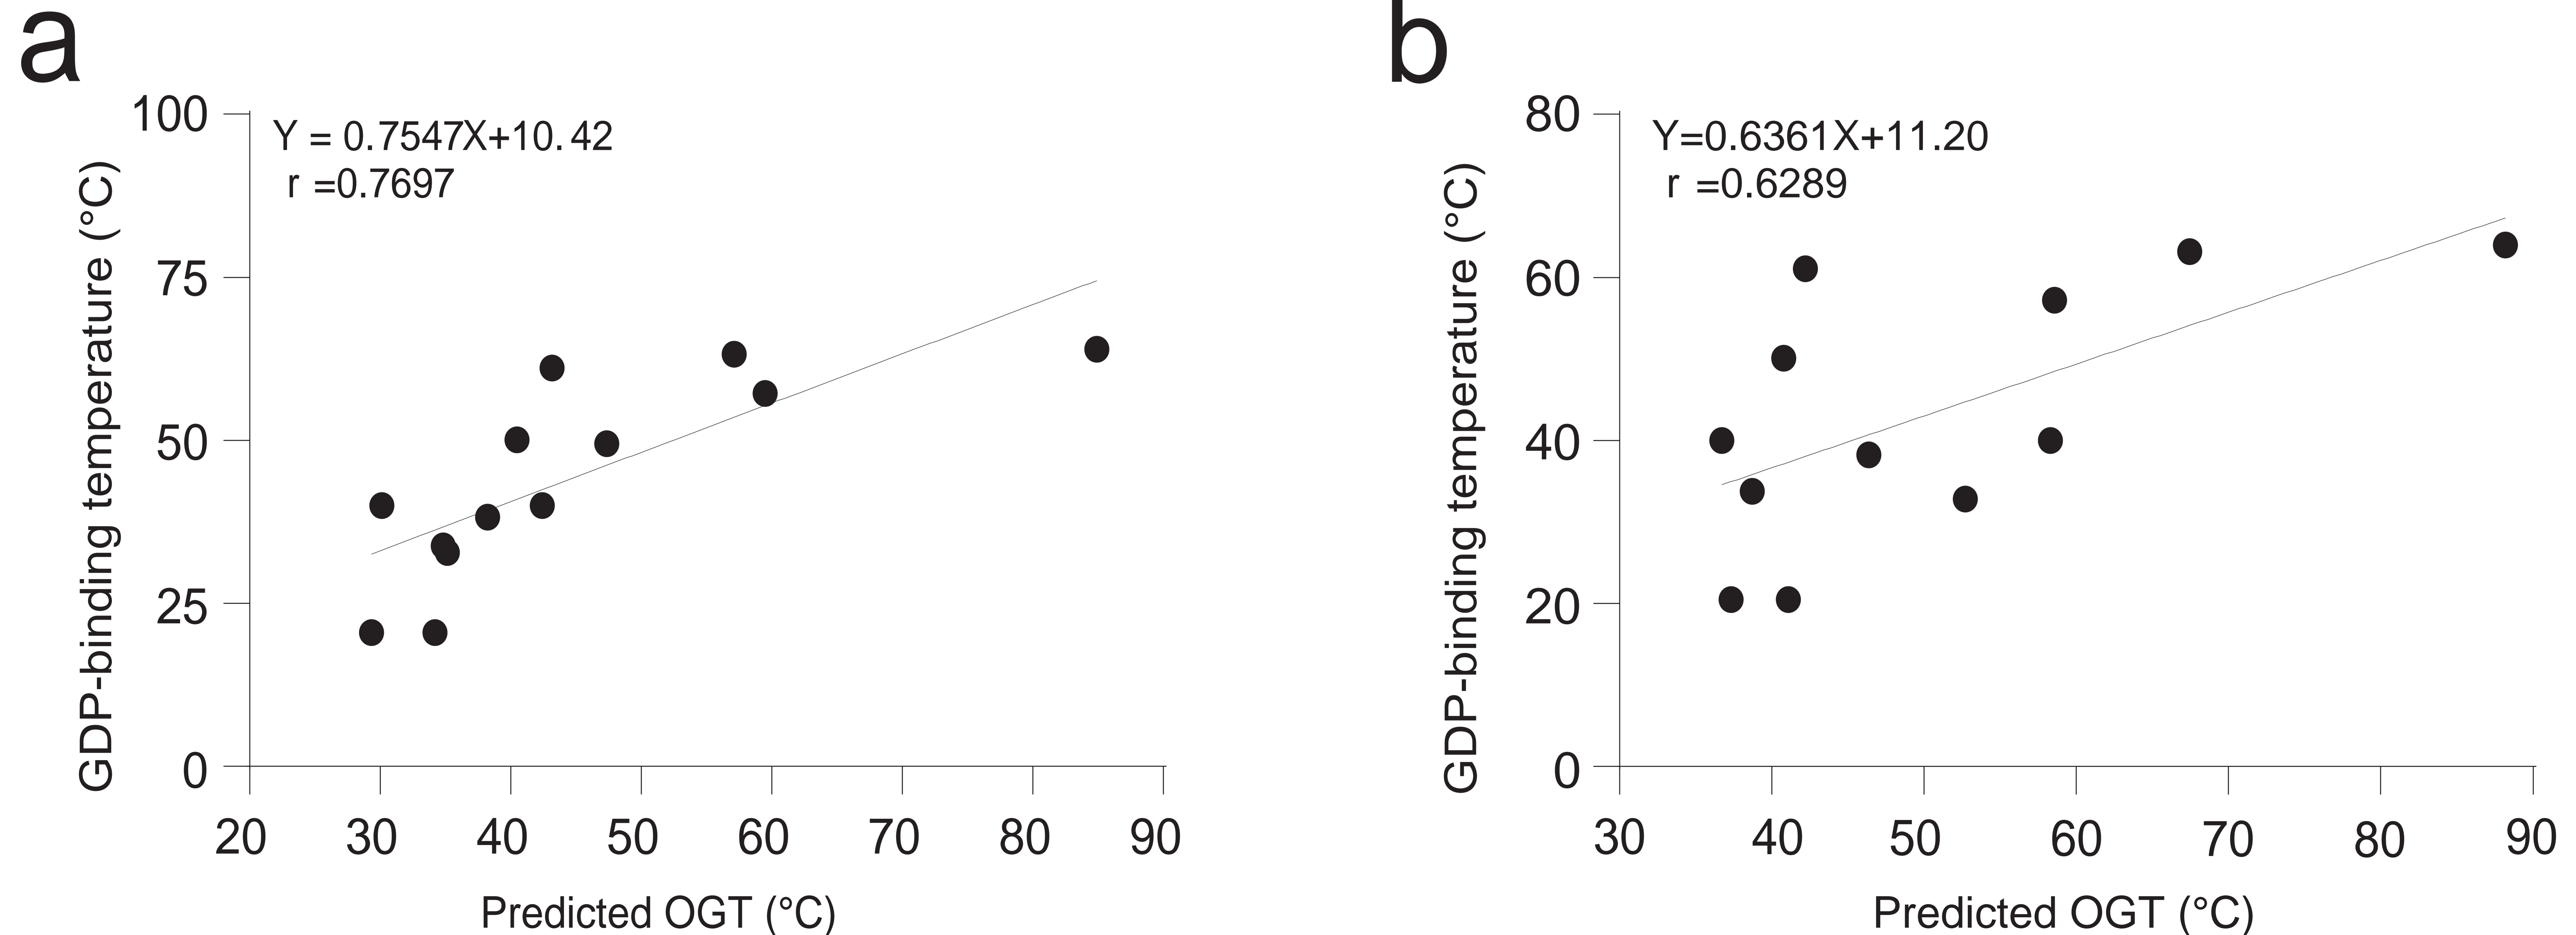

**Fig. S8 Amino acid sequences of ancestral EF-1A proteins used here.** The Posterior probabilities (PP) for amino acid states of the ancestral EF-1A are labeled.

Loki CA : MAKDKPHLNLVIIGHIDHGKSTMMGHLLIKTGAVSDREARELEKLAQELDRESWKYAYVFDRLKEERQRTITDLAFRKFETKNYYFTIIDAPGHADDFVKNMITGASQADAAILVVSAGKGEFEAGIS- - - - - ANGQTREHAF LAKTLGVNQLVVAI NKMD- - TWNYSED RYNEVKEEVSDLLKNV- - : 179  
LAsCA : - - MSKPHLNLVIIGHVDHGKSTMMGRLLYETGAI DERTIRKFE EEA EKL GKESFKFAWLDRLKEERERGLTIDLA FRKFETKKYYFTIIDAPGHRDFIKNMITGASQADAAILVVSAGKGEFEAGIG- - - - - PGGQTREHAF LARTLGVNQLI VAVNKMDSTVNYSQERYNEI KEEVSDFLKSI- - : 179  
Node205 : MSKEKPHLNLVIIGHVDHGKSTMTGHLLYL CGAI DERTIEKYAKESEKMGKGSWKYAWL DKLKEERERGLTIDI AFFKFETKKYYFTIIDAPGHRDFVKNMITGT SQADAAILVVSAGKGEFEAGIS- - - - - AEGQTREHALLAKTLGVNQLI VAVNKMDPTVDWSQERYNEI KEEVSGRLKQF- - : 181  
Node208 : MSKEKPHLNLVIIGHVDHGKSTMTGHLLYL CGAI DERTIEKFEKEAEKMGKGSFKYAWL DKLKEERERGLTIDLA FRKFETKKYYFTIIDAPGHRDFVKNMITGT SQADAAILVVSAGKGEFEAGIS- - - - - AEGQTREHALLAKTLGVNQLI VAVNKMDPTVDWSQERYNEI KEEVSGRLKQF- - : 181  
Node214 : MSKEKPHLNLVIIGHVDHGKSTLMGHLLYL TGAI DERTIRKFE EEA EKL GKGSFKYAWL DKLKEERERGLTIDLA FWKFETKKYYFTIIDAPGHRDFVKNMITGT SQADAAILVVSAGKGEFEAGIG- - - - - PGGQTREHAF LAKTLGVNQLI VAVNKMDPTVNWSQERYNEI KEEVSGLLKQI- - : 181  
Node215 : MSKEKPHLNLVIIGHVDHGKSTLMGHLLYL TGAI DERTIRKFE EEA EKL GKGSFKYAWL DKLKEERERGLTIDLA FWKFETKKYYFTIIDAPGHRDFVKNMITGASQADAAILVVSAGKGEFEAGIG- - - - - AGGQTREHAF LAKTLGVNQLI VAVNKMDPTVNWSQERYNEI KEEVSGLLKQI- - : 181  
Node216 : MSKEKPHLNLVIIGHVDHGKSTLMGHLLYL TGAI DERTIRKLE EEA EKL GKGSFKYAWL DRLKEERERGLTIDLA FRKFETKKYYFTIIDAPGHRDFVKNMITGASQADAAILVVSAGKGEFEAGIG- - - - - AGGQTREHAF LARTLGVNQLI VAVNKMDPTVNWSQERYNEI KEEVSDLLKQI- - : 181  
Node364 : MSKEKPHLNLVIIGHVDHGKSTLMGHLLYL TGAI DERTIRKFE EEA EKL GKGSFKYAWL DKLKEERERGLTIDLA FWKFETKKYYFTIIDAPGHRDFVKNMITGT SQADAAILVVSAGKGEFEAGIG- - - - - KGGQTV EHA VLAATLGVNQFI VAVNKMDPTVNWSQDRYNEI KSNVDKLIKER- - : 181  
Node217 : MSEKKPHLNLVIIGHVDHGKSTLMGHLLYL TGAI SDREMRKLEKMAQKLDKGSFKYAFVLDRLKEERERGLTIDLA FRKFETKKYYFTIIDAPGHRDFVKNMITGASQADAAILVVSAGKGEFEAGIS- - - - - AGGQTREHAF LARTLGVNQLI VAVNKMDPTVNWSQERYNEI KEEVSDLLKQV- - : 181  
Node218 : MSEKKPHLNLVIIGHVDHGKSTLMGHLLYLKTGAI SDREMRKLEKL AQKLDKGSFKYAFVMDRLKEERERGLTIDLA FRKFETQKYYFTIIDAPGHRDFVKNMITGASQADAAILVVSARKGEFEAGIS- - - - - AGGQTREHAF LARTLGVNQLI VAVNKMDSTVNWSQERYNEI KEEVSGLLEGK- - : 181  
Node232 : MSEKKPHLNLVIIGHVDHGKSTMMGHLLI LTGAI SDREMRLEKMAQKLDKGSFKYAFVFDRLKEERERGLTIDLA FRKFETKKYYFTIIDAPGHRDFVKNMITGASQADAAILVVSAGKGEFEAGIS- - - - - AGGQTREHAF LARTLGVNQLI VAVNKMDPTVNWSQERYNEI KEEVSDLLKQV- - : 181  
Node204 : MSKEKPHLNLVIIGHVDHGKSTMTGHLLFL CGAI DERTIEKYAKESEKMGKGSWKYAWL DKLKEERERGLTIDISFFKFETKKYVFTIIDAPGHRDFVKNMITGASQADAAILVVSAGKGEFEAGISAE RGT PKGDWRI PGGQTREHALLAKTLGVNQLI VAVNKMD- - TVDWSQERYNEI KEEVSALLKQFVE : 193

Loki CA : - - GYPVE- - - - KIPFVPVSALTGDNLTEKSTTLPWYDGPTLIEALDQFELPEKPTDKPLRLPI QDVYKIKGAGVVPVGRVETGVLKVGDKVIIMPTGY- - - - - FGEVRSIEMHHEEMPQAE PGDNI GFNIRGITMKDVHRGDVVGHADNPPTVVT PNGNFTGQII VIW- - - - - HPTAI AQGYTPVVHA : 351  
LAsCA : - - GYKVD- - - - KIPFIPVSAWTDGNLTEKSPNMPWYDGPTLLEALDTFEVPPKPIDKPLRIPI QDVYSITGVGTVPVGRVETGVLKVGDKVIFMPPGV- - - - - TGEVKSITEMHHEQMPOAE PGDNI GFNVIRGIEKKDKRGDVAGHV-DNPPTVAE- - - EFTGQII VIY- - - - - HPTAI AVGYTPVIHA : 348  
Node205 : - - GYDLD- - - - KVPFVPVSGMTGDNLTDKSVTL PWYDGPTLLEALDTFEVPPKPTDKPLRLPI QDVYSITGITVPVGRVETGVLKPGDKVIFAPSGG- - - - - KAEVKSITEMHHEQLPOAE PGDNI GFNVIRGIAKKDKRGDVVGHPGDNPPKVAK- - - TFTATVI VIK- - - - - GPTAI AAGYTPVIHC : 351  
Node208 : - - GYDLD- - - - KVPFVPVSGMTGDNLTEKSVTPWYDGPTLLEALDTFEVPPKPIDKPLRLPI QDVYSITGITVPVGRVETGVLKPGDKVIFAPSGY- - - - - KAEVKSITEMHHEQLPOAE PGDNI GFNVIRGISKKDKRGDVVGHPGDNPTVAK- - - EFTATVI VIK- - - - - GPTAI AAGYTPVIHC : 351  
Node214 : - - GYDLD- - - - KVPFVPVSAWTDGNLTEKSVTPWYDGPTLLEALDTFEVPPKPIDKPLRIPI QDVYSITGVGTVPVGRVETGVLKVGDKVIFMP SGL- - - - - TGEVKSITEMHHEQLQQAEPGDNI GFNVIRGISKKDKRGDVAGHPGDNPTVAK- - - EFTGQII VIY- - - - - HPTAI AAGYTPVIHA : 351  
Node215 : - - GYDLD- - - - KVPFVPVSAWTDGNLTEKSVTPWYDGPTLLEALDTFEVPPKPIDKPLRIPI QDVYSITGVGTVPVGRVETGVLKVGDKVIFMPPGL- - - - - TGEVKSITEMHHEQLQQAEPGDNI GFNVIRGISKKDKRGDVAGHP-DNPPTVAK- - - EFTGQII VIY- - - - - HPTAI AAGYTPVIHA : 350  
Node216 : - - GYDVD- - - - KVPFI PVSAWTDGNLTEKSVTPWYDGPTLLEALDTFEVPPKPIDKPLRIPI QDVYSITGVGTVPVGRVETGVLKVGDKVIFMPPGL- - - - - TGEVKSITEMHHEQLQQAEPGDNI GFNVIRGISKKDKRGDVAGHV-DNPPTVAE- - - EFTGQII VIY- - - - - HPTAI AAGYTPVIHA : 350  
Node364 : - - ELDDK- - - - KVPYVPVSAWTDGNLTEKSVTPWYDGPTLLEALDTFEVPPKPIDKPLRIPI QDVYSITGVGTVPVGRVETGVLKVGDKVIFMPSGG- - - - - KGEVKSITEMHHEQLQQAEPGDNI GFNVIRGISKKDKRGDVAGHP-DNPPTVAK- - - EFTGQIFVIY- - - - - HPPTAI AAGYTPVIHA : 351  
Node217 : - - GFPVD- - - - KVPFI PVSAWTDGNLTEKSTTMPWYDGPTLLEALDTFELPPKPIDKPLRIPI QDVYSITGVGTVPVGRVETGVLKVGDKVIFMPPGV- - - - - TGEVKSITEMHHEQLQQAEPGDNI GFNVIRGISKKDKRGDVAGHV-DNPPTVVE- - - EFTGQII VIY- - - - - HPTAI AAGYTPVIHA : 350  
Node218 : - - GYDVD- - - - KIPFI PVSAWTDGNLTEPSVTPWYKGPTLLEALDTFELPPKPIDKPLRIPI QDVYITIGVGTVPVGRVETGVLKVGDKVIFMPPGV- - - - - TGEVKSITEMHHERLEQAEPGDNI GFNVIRGIGKGDIKRGDVAGHV-DNPPTVVE- - - EFTGQII VIH- - - - - HPTAI AAGYTPVIHA : 350  
Node232 : - - GFPVD- - - - KVPFI PVSAWTDGNLTEKSVTPWYDGPTLLEALDTFELPPKPIDKPLRLPI QDVYSITGVGTVPVGRVETGVLKVGDKVIFMPPGL- - - - - TGEVRSIEMHHEQLQQAEPGDNI GFNIRGISKKDKRGDVAGHV-DNPPTVVE- - - EFTGQII VIY- - - - - HPTAI APGYTPVIHA : 350  
Node204 : GSGYRLDGKGLGVK FVPTSGMTGDNLTDKSDKMPWYDGPSLLEALDTFEVPEKPTDKPLRLPI QDVYSITGITVPVGRVESGVLKPGDKVIFAPSKYGI KPLTAEVKSITEMHHEQLPOAE PGDNI GFNVIRGIAKKDKRGDVVGHPGDNPPKVAD- - - TFTATVI VIKGLGKPGKKANHPPTGIT AAGYTPVIHC : 385

Loki CA : HTAQVACKFVELSKLDPKTGQVIEDNPQFLKKNDAAIVKLQPIKKLCL EKYKDFPELGRFAVRDMGRTVAVGVVKDIETG : 432 mean posterior probability (PP) =0.90  
LAsCA : HTAQVACRFTELSKLDPR TGQVVEENPDFIKQGDAIVKLKPI RPMVIEKYSDFPQLGRFAVRDMGRTVAVGVVIDVKPK : 429 mean PP =0.92  
Node205 : GTAQVACRF AEIKEKIDRRTGQVKEANPDFLKN GDRATVVMRPVRPMVVEKFSDFPQLGRFAVRDMGQTAVAGI VKDVQPK : 432 mean PP =0.88  
Node208 : GTAQVACRF AE LKSKI DRRTGQVKEANPDFLKN GDAATVVMVPTRPMVVEKYSDFPQLGRFAVRDMGQTAVAGI VKDVT PK : 432 mean PP =0.91  
Node214 : HTAQVACRF AE LKSKI DRRTGQVVEENPDFLKS GDAIVKLVPTRPMVIEKYSDFPQLGRFAVRDMGRTVAVAGI VKDVT PK : 432 mean PP =0.93  
Node215 : HTAQVACRF AE LISKIDRRTGQVVEENPDFLKG GDAIVKLVPTRPMVIEKYSDFPQLGRFAVRDMGRTVAVAGI VKDVT PK : 431 mean PP =0.94  
Node216 : HTAQVACRF EELISKIDPRTGQVVEENPDFLKG GDAIVKFKPI RPMVIEKYSDFPQLGRFAVRDMGRTVAVGVVKDVT PK : 431 mean PP =0.94  
Node364 : HTAQVACTFAELQSKI DRRTGQVVEENPDY LKS GDAIVKLVPTRPMVIEKYSDFPQLGRFAVRDMGRTVAVAGI VKDVT PK : 432 mean PP =0.92  
Node217 : HTAQVACKFEELISKIDPRTGQVQEKPDFLKG GDAIVKFKPI RPLVIEKYSDFPQLGRFAVRDMGRTVAVGVVKEVT PK : 431 mean PP =0.92  
Node218 : HTAQVACKFTELSKIDPRTGQVQEKPDFIKQGDAIVKFKPI RPLVIEKYSDFPQLGRFAVRDMGRTVAVGVVKEVT PK : 431 mean PP =0.91  
Node232 : HTAQVACKFEELIQKIDPRTGQVQEKPDFLKG GDAIVKFKPI RPLVIEKYSDFPQLGRFAVRDMGRTVAVGVVKEVKPK : 431 mean PP =0.92  
Node204 : GTAQVACRF A I KEKIDRRTGQVKEANPDFLKG GDRATVVMRPVRPMVVEKFSDFPQLGRFAVRDMGQTAVAGI VKDVQPK : 466 mean PP =0.81
